# Supplementary material for: Significant 13C NMR signal enhancements in amino acids via adiabatic demagnetization and remagnetization cross polarization
Source: Royal Society of Chemistry journal article supplement (doi:10.1039/d4cc03604b), 2024-01-01
Supplement: d4cc03604b1.pdf [file d4cc03604b1.pdf]

## Supporting Information for

“Significant  $^{13}\text{C}$  NMR Signal Enhancements in Amino Acids via Adiabatic Demagnetization and Remagnetization Cross Polarization”

Kazi S. Ahmed,<sup>a</sup> Kristopher J. Harris<sup>a,b,\*</sup>

*a. Chemistry Program, Louisiana Tech University, Ruston, Louisiana 71272, United States. E-mail: kris.j.harris@gmail.com*

*b. Current Address: Department of Chemistry, University of Victoria, Victoria BC V8P 5C2.*

\*Author to whom correspondence should be addressed.

E-mail: kris.j.harris@gmail.com

### Table of Contents:

|                                                                    |   |
|--------------------------------------------------------------------|---|
| Table S1: Optimized Conditions for NMR Experiments on Glycine      | 2 |
| Table S2: Optimized Conditions for NMR Experiments on Tyrosine HCl | 2 |
| Bruker Pulse Sequence for ADRF/ARRF CP                             | 3 |

**Table S1:** *Experimental Parameters for NMR Experiments on Stationary Glycine Sample*

| <i>Parameter</i>                             | <i>Hartmann-Hahn CP</i>    | <i>ADRF/ARRF CP</i> |
|----------------------------------------------|----------------------------|---------------------|
| External field, B <sub>0</sub> (T)           | 7.05                       |                     |
| Spectrometer                                 | Bruker Avance Neo          |                     |
| Probe and sample holder                      | Bruker 3.2 mm HX MAS probe |                     |
| Pre-scan delay (s)                           | 5                          |                     |
| Number of transients                         | 128                        |                     |
| <sup>1</sup> H $\pi/2$ rf power (kHz)        | 62.5                       |                     |
| <sup>1</sup> H decoupling during acquisition | 62.5 kHz                   |                     |
| <sup>1</sup> H transfer pulse:               |                            |                     |
| Shape                                        | Linear Ramp                | Downward tanH       |
| Power (kHz)                                  | 55 to 70                   | 50 at shape maximum |
| Length (ms)                                  | 6                          | 5                   |
| <sup>13</sup> C transfer pulse:              |                            |                     |
| Shape                                        | Constant                   | Upward tanH         |
| Power (kHz)                                  | 62.5                       | 55 at shape maximum |
| Length (ms)                                  | 6                          | 40                  |

**Table S2:** *Experimental Parameters for NMR Experiments on Stationary<sup>†</sup> and Spinning<sup>‡</sup> Samples of Tyrosine HCl*

| <i>Parameter</i>                             | <i>Hartmann-Hahn CP</i>    | <i>ADRF/ARRF CP</i> |
|----------------------------------------------|----------------------------|---------------------|
| External field, B <sub>0</sub> (T)           | 7.05                       |                     |
| Spectrometer                                 | Bruker Avance Neo          |                     |
| Probe and sample holder                      | Bruker 3.2 mm HX MAS probe |                     |
| Pre-scan delay (s)                           | 5                          |                     |
| <sup>1</sup> H $\pi/2$ rf power (kHz)        | 62.5                       |                     |
| <sup>1</sup> H decoupling during acquisition | 62.5 kHz                   |                     |
| <sup>1</sup> H transfer pulse:               |                            |                     |
| Shape                                        | Linear Ramp                | Downward tanH       |
| Power (kHz)                                  | 55 to 70                   | 40 at shape maximum |
| Length (ms)                                  | 6                          | 1                   |
| <sup>13</sup> C transfer pulse:              |                            |                     |
| Shape                                        | Constant                   | Upward tanH         |
| Power (kHz)                                  | 62.5                       | 50 at shape maximum |
| Length (ms)                                  | 6                          | 40                  |

<sup>†</sup>Stationary-sample experiments used 128 transients for both HH CP and ADRF/ARRF CP

<sup>‡</sup>Spinning-sample experiments used 1 transient, a 62.5 kHz rf power for the <sup>13</sup>C  $\pi/2$  flip-back and readout pulses, and 10 kHz sample rotation initiated during the 60 s z-storage period

### **Bruker Pulse Sequence for ADRF/ARRF CP:**

```
;CP using ADRF/ARRF
;Make AD/AR shapes with Bruker's waveform generator
1 ze
2 d1 do:f2
  (p3 pl12 ph1):f2
  (p20:sp0 ph20):f2
  (p21:sp1 ph21):f1
  1u cpds2:f2          ;decoupling sequence
  go=2 ph31
  1m do:f2
  wr #0
HaltAcqu, 1m
exit
ph0= 0
ph1= 1 3
ph20= 2 0
ph21= 0 2 1 3 ; cyclops receiver phase cycling
ph31= 1 2 1 3
```
